# Supplementary material for: Induction of smectic polymorphism in bent-core derivatives of the 6-oxoverdazyl by partial fluorination of alkyl chains
Source: Royal Society of Chemistry journal article supplement (doi:10.1039/c6ra21383a), 2016-01-01
Supplement: c6ra21383a1.pdf [file c6ra21383a1.pdf]

Electronic Supplementary Information for

**Induction of smectic polymorphism in bent-core derivatives of the  
6-oxoverdazyl by partial fluorination of alkyl chains**

Sylvia Ciastek,<sup>a</sup> Piotr Kaszyński,<sup>a,b,c\*</sup> Damian Pocięcha,<sup>d</sup> and Marcin Jasiński<sup>a</sup>

<sup>a</sup> Faculty of Chemistry, University of Łódź, Tamka 12, 91-403 Łódź, Poland

<sup>b</sup> Organic Materials Research Group, Center of Molecular and Macromolecular Studies, Polish Academy of Sciences, Sienkiewicza 112, 90-363 Łódź, Poland

<sup>c</sup> Department of Chemistry, Middle Tennessee State University, Murfreesboro, TN, 37130, USA

<sup>d</sup> Department of Chemistry, University of Warsaw, Żwirki i Wigury 101, 02-089 Warsaw, Poland

**Table of Content:**

|                            |         |
|----------------------------|---------|
| 1. Additional DSC data     | ....S2  |
| 2. Powder XRD measurements | ....S4  |
| 3. Archive for DFT results | .....S8 |

## 1. Additional DSC data

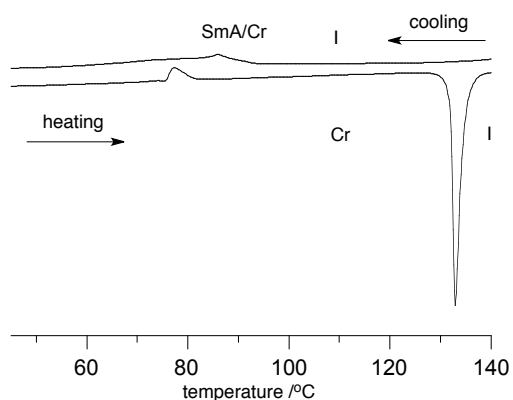

**Fig. S1.** DSC traces of **2[6,6]a**. The heating and cooling rates are 10 K min<sup>-1</sup>.

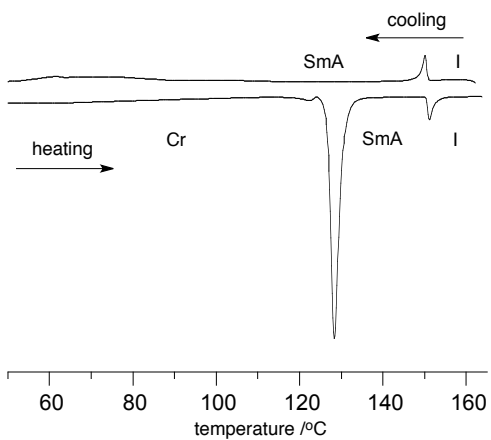

**Fig. S2.** DSC traces of **2[8,4]a**. The heating and cooling rates are 10 K min<sup>-1</sup>.

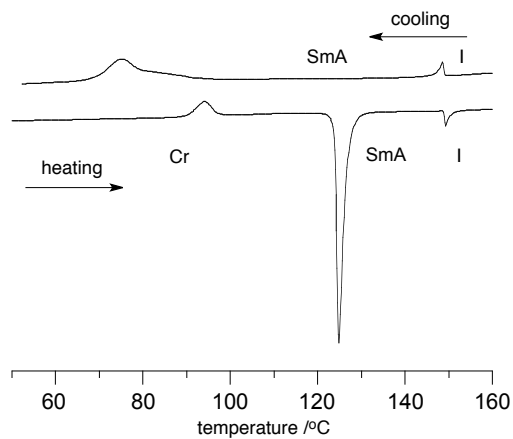

**Fig. S3.** DSC traces of **2[8,6]a**. The heating and cooling rates are 10 K min<sup>-1</sup>.

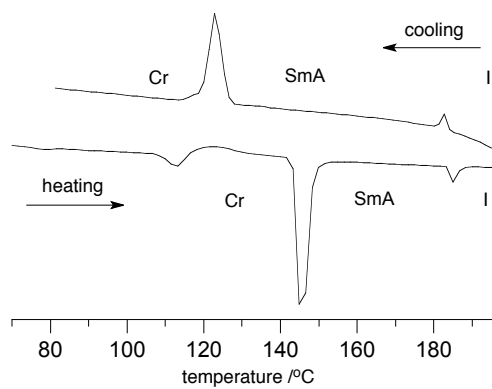

**Fig. S4.** DSC traces of **2[10,4]a**. The heating and cooling rates are  $10 \text{ K min}^{-1}$ .

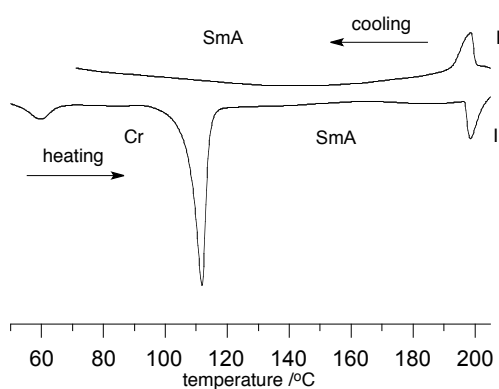

**Fig. S5.** DSC traces of **2[6,6]b**. The heating and cooling rates are  $35 \text{ K min}^{-1}$ .

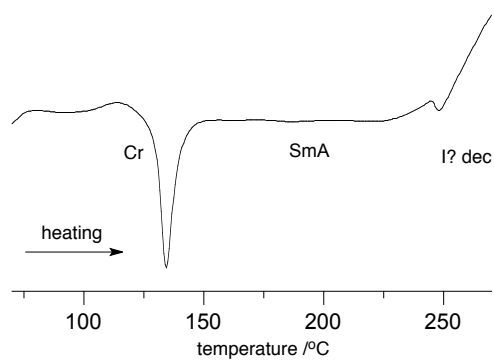

**Fig. S6.** DSC traces of **2[8,4]b**. The heating rate is  $35 \text{ K min}^{-1}$ .

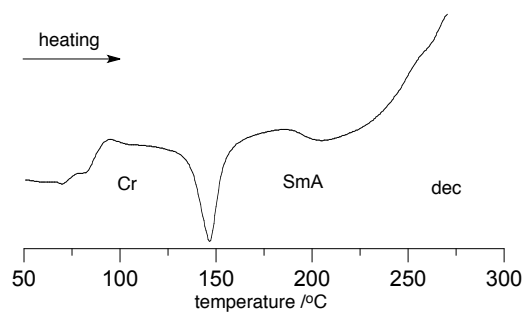

**Fig. S7.** DSC traces of **2[10,4]b**. The heating rate is 35 K min<sup>-1</sup>.

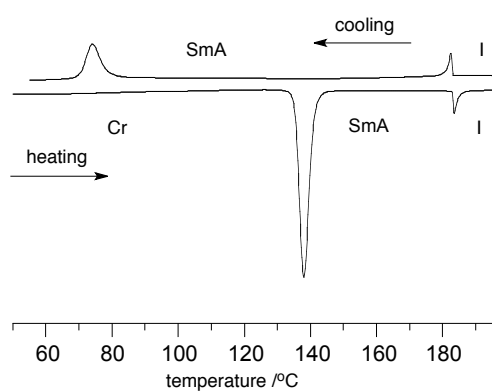

**Fig. S8.** DSC traces of **2[6,6]c**. The heating and cooling rates are 10 K min<sup>-1</sup>.

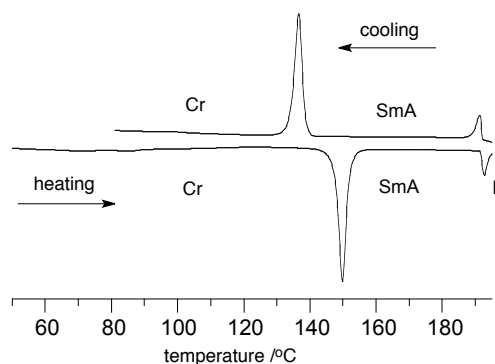

**Fig. S9.** DSC traces of **2[6,6]d**. The heating and cooling rates are 10 K min<sup>-1</sup>.

## 2. Powder XRD measurements

X-ray diffraction experiments in broad angle range were performed with Bruker D8 GADDS (Cu K $\alpha$  radiation, Göbel mirror, point collimator, Vantec 2000 area detector) equipped with a modified Linkam heating stage. For small angle diffraction experiments Bruker Nanostar system was used (Cu K $\alpha$  radiation, cross-coupled Göbel mirrors, three

pinhole collimation, Vantec 2000 area detector). Samples were prepared in a form of a thin film or a droplet on a heated surface. The X-ray beam was incident nearly parallel to sample surface. Results are shown in Fig. S10 – S16.

Analysis demonstrated that the temperature dependence for **2[6,6]a**, **2[8,6]a**, **2[6,6]b**, **2[6,6]c** is well described by a quadratic function, e.g.  $d_{01} = a \cdot T^2 + b$ , while profiles for **2[8,4]a**, **2[10,4]a** and **2[6,6]d** are better described by cubic dependence on temperature ( $d_{01} = a \cdot T^3 + b$ ). For comparison purposes, thermal expansion coefficients are obtained from fitting of the  $d_{01}(T)$  data to the quadratic function  $d_{01} = a \cdot T^2 + b$ .

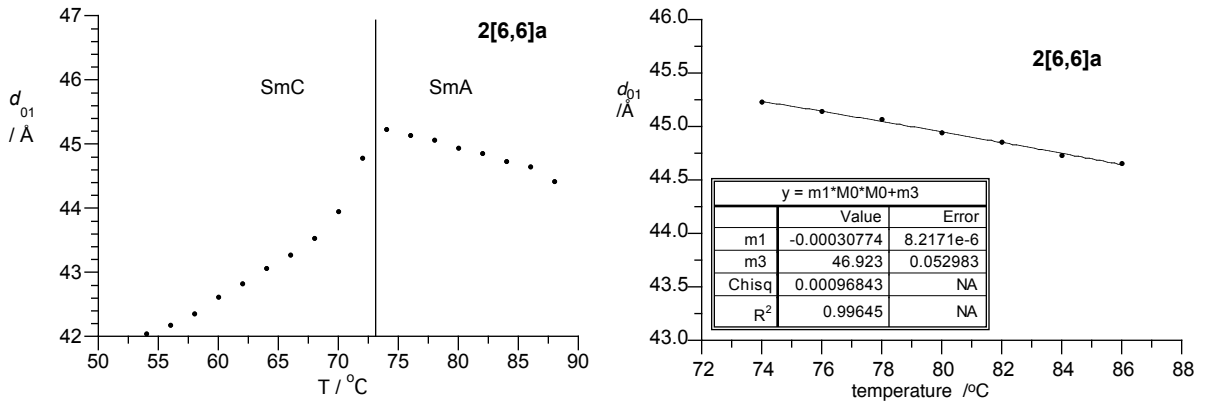

**Fig. S10.** Left: Layer thickness  $d_{01}$  as a function of temperature. Right: fitting the SmA datapoints in a range of 86 °C – 74 °C to the function  $d_{01} = a \cdot T^2 + b$ .

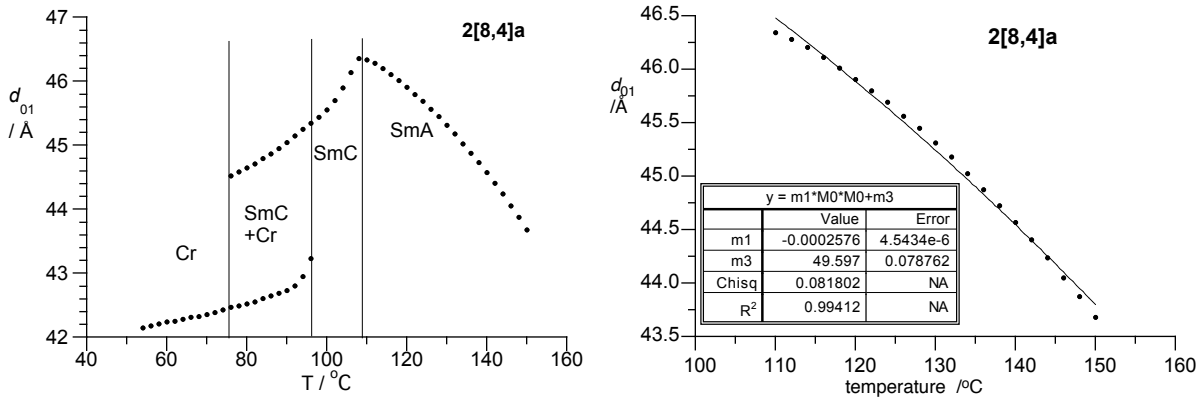

**Fig. S11.** Left: Layer thickness  $d_{01}$  as a function of temperature. Right: fitting the SmA datapoints in a range of 150 °C – 110 °C to the function  $d_{01} = a \cdot T^2 + b$ .

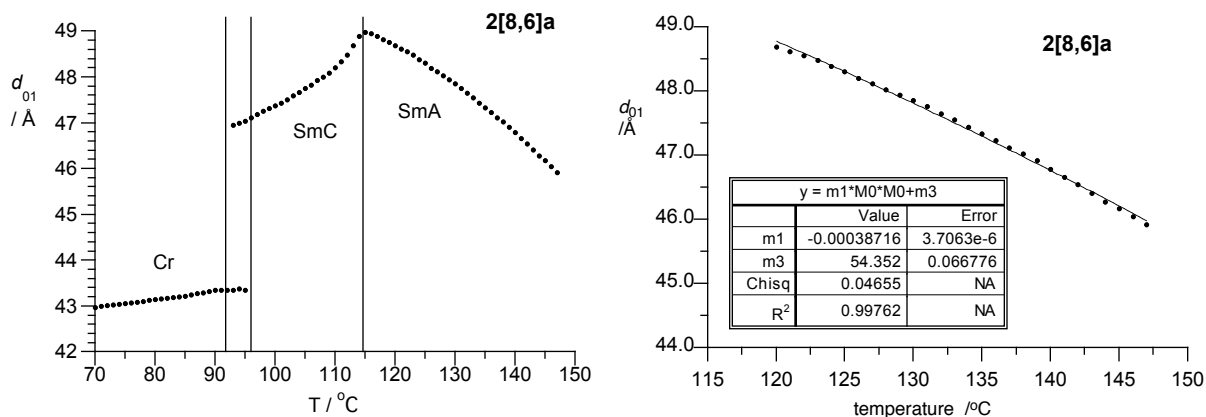

**Fig. S12.** Left: Layer thickness  $d_{01}$  as a function of temperature. Right: fitting the SmA datapoints in a range of 147 °C – 120 °C to the function  $d_{01} = a \cdot T^2 + b$ .

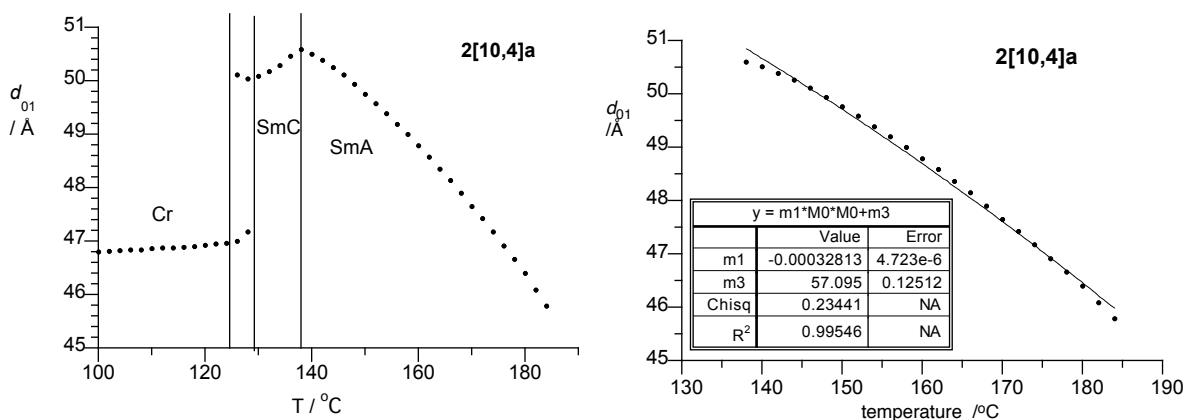

**Fig. S13.** Left: Layer thickness  $d_{01}$  as a function of temperature. Right: fitting the SmA datapoints in a range of 184 °C – 138 °C to the function  $d_{01} = a \cdot T^2 + b$ .

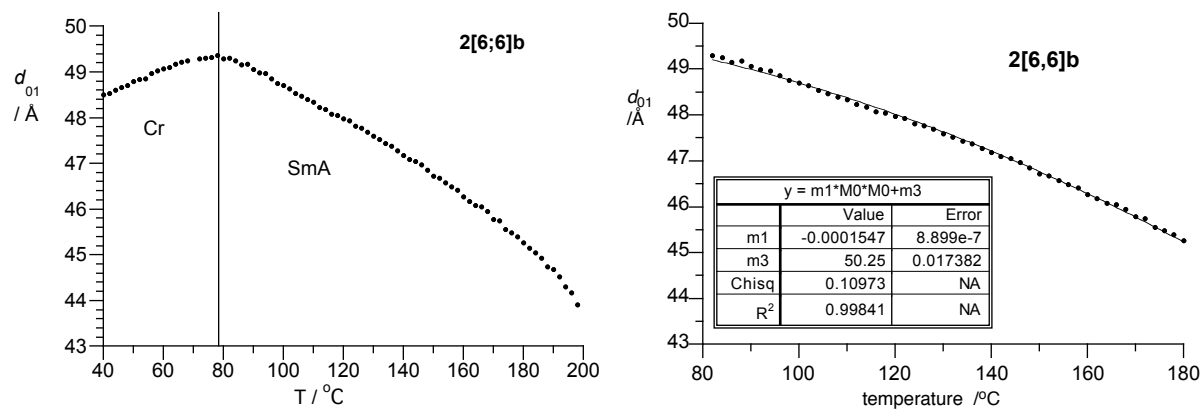

**Fig. S14.** Left: Layer thickness  $d_{01}$  as a function of temperature. Right: fitting the SmA datapoints in a range of 180 – 82 °C to the function  $d_{01} = a \cdot T^2 + b$ .

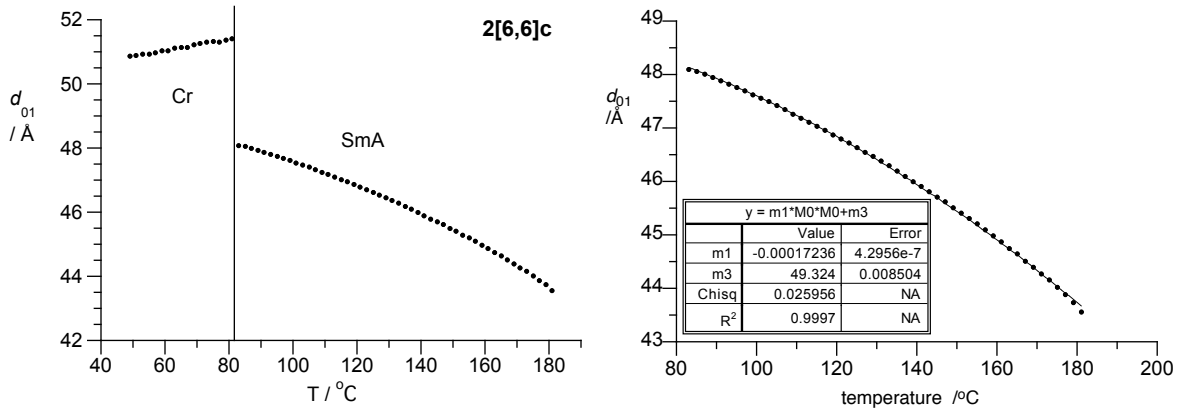

**Fig. S15.** Left: Layer thickness  $d_{01}$  as a function of temperature. Right: fitting the SmA datapoints in a range of 182 – 82 °C to the function  $d_{01} = a \cdot T^2 + b$ .

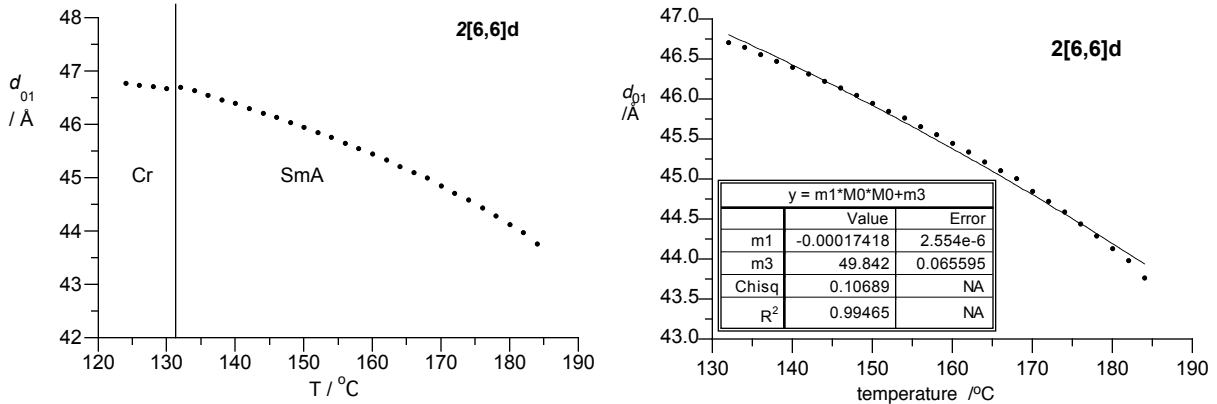

**Fig. S16.** Left: Layer thickness  $d_{01}$  as a function of temperature. Right: fitting the SmA datapoints in a range of 184 – 132 °C to the function  $d_{01} = a \cdot T^2 + b$ .

### 3. Archive for DFT results

#### 2[6,6]a

```
1\1\GINC-LOCALHOST\FOpt\UB3LYP\6-31G(d)\C53H40F29N4O7(2)\PIOTR\24-Feb-2016\0\#\# UB3LYP/6-31G* FOpt geom=(nodistance,noangle) fcheck SCF=direct\1,5-(4-F(CF2)6(CH2)6O-C6H4COOC6H4)-3-Thienyl oxoverdazyl, C2 pseudosymm\0,2\O,0.0208891019,3.2899768514,-0.2231272282\C,0.0281750412,4.4999730685,-0.1132062234\N,-1.138262422,5.2641384374,0.0723004862\N,-1.1455160753,6.6273350626,0.1630802059\C,0.0475806125,7.1955199014,0.1095212491\N,1.2339242471,6.6284753843,-0.0280482034\N,1.2056191622,5.2680799377,-0.1567965278\C,2.4962543646,4.6443903221,-0.2449262529\C,2.7182788067,3.522914817,-1.0521819803\C,3.9949918907,2.9729825567,-1.1208077855\C,5.043408669,3.5403545515,-0.3987624774\C,4.8320209492,4.6692465456,0.3943594545\C,3.5555646546,5.216399927,0.4696217753\C,-2.438313963,4.6541201844,0.0863962598\C,-3.5121412947,5.3749883466,-0.449720
```

6138\C,-4.8002577109,4.8493549535,-0.4250866458\C,-5.0093400774,3.5885  
923525,0.1378226346\C,-3.9444220018,2.8698492253,0.6805883616\C,-2.657  
3958088,3.3968313066,0.6628482857\O,-6.2604932092,3.0053353314,0.28448  
25341\O,6.2980579572,2.9750395864,-0.5887880347\C,-7.2205746281,3.0804  
635648,-0.6996447494\O,-7.0523575461,3.6431087039,-1.7593814984\O,6.81  
3439756,2.9418387658,1.6331558072\C,7.125028211,2.7190630643,0.4841186  
473\C,-8.460177059,2.3851567593,-0.2889141135\C,-9.5313824572,2.369635  
9035,-1.1907998511\C,-8.6081213666,1.7448521274,0.9551060042\C,-10.728  
6062647,1.7341820874,-0.8752151413\C,-9.7948794932,1.1095345251,1.2798  
515877\C,-10.8651362648,1.0975857129,0.3681073051\C,8.4139981159,2.142  
1110383,0.0447018449\C,9.3449228109,1.7975256508,1.032449165\C,8.74438  
82494,1.9309928238,-1.3063297193\C,10.5812801171,1.2544307284,0.697342  
9831\C,9.9732360075,1.3932659005,-1.6516439922\C,10.9026859832,1.05080  
98883,-0.6536534489\O,-11.9806659361,0.4462699879,0.7840081114\O,12.07  
67145654,0.5334163664,-1.0968537465\C,-13.1197487977,0.3852941165,-0.0  
782708624\C,-14.1981557818,-0.4091951858,0.6455879402\C,13.0797814871,  
0.1676607838,-0.145587489\C,14.2844083271,-0.3517328605,-0.9182018873\  
H,3.3760403072,6.0964621915,1.0751913893\H,5.6468563085,5.1058299025,0  
.956844285\H,4.1884364482,2.1038935172,-1.7408681703\H,1.9078773514,3.  
078447745,-1.6124905616\H,-1.8380310326,2.8331942394,1.0852864822\H,-4  
.1351362164,1.8985192296,1.1249193453\H,-5.6236047493,5.4062948336,-0.  
8505272346\H,-3.3353448025,6.3557901915,-0.8739606424\H,-9.4109808912,  
2.865567244,-2.1484424938\H,-7.7870770351,1.7496627658,1.6626537755\H,  
-11.5408028334,1.7383776567,-1.5926116651\H,-9.9250887358,0.6111100878  
,2.235047375\H,9.083486313,1.9626069414,2.0725894319\H,8.0323859896,2.  
1933933485,-2.0803988065\H,11.2811084478,0.9957310252,1.4830232085\H,1  
0.2446550915,1.2264885151,-2.6890980111\H,-12.8443547498,-0.1002398124  
, -1.0253002914\H,-13.4679580386,1.402688164,-0.3070629842\H,-13.800266  
8168,-1.4048697607,0.8799113557\H,-14.4080456664,0.0800217781,1.605230  
8129\H,12.6858874441,-0.6038718358,0.5314599194\H,13.3537422571,1.0427  
818908,0.4607694109\H,13.9672002373,-1.2010127089,-1.5365829387\H,14.6  
222186217,0.4323467199,-1.6078146305\C,-15.4881996655,-0.5359873743,-0  
.1746458693\C,-16.5680516893,-1.3562029508,0.5431772731\H,-15.26517391  
16,-1.0027765994,-1.1449977279\H,-15.8826953832,0.465509598,-0.3994514  
994\C,-17.8672544005,-1.474229224,-0.2629829837\H,-16.1765877812,-2.36  
12476541,0.756904409\H,-16.7838531464,-0.89815393,1.519177526\C,-18.92  
20469295,-2.3206393911,0.4637655886\H,-18.2760667871,-0.4754910539,-0.  
4575614536\H,-17.657879638,-1.9245460346,-1.2410647789\H,-18.545533770  
4,-3.3316066339,0.6485292354\H,-19.1687836279,-1.8815898172,1.43722271  
4\C,-20.2141485656,-2.4402728985,-0.3268099457\C,-21.3133962264,-3.256  
8856841,0.4053035544\C,-22.5648708622,-3.6176530675,-0.4500102132\C,-2  
3.7882188177,-4.0820054514,0.3999357934\C,15.4323345521,-0.7711741132,  
0.0088185971\C,16.6625887314,-1.2810750571,-0.7531562046\H,15.08303291  
73,-1.5547709372,0.6967836067\H,15.7266197082,0.0804342175,0.639264022  
1\C,17.8067099564,-1.6988738192,0.1783970893\H,16.3729198537,-2.132936  
4215,-1.3850067753\H,17.0152811217,-0.4971561683,-1.4388857142\C,19.03  
83526986,-2.1898955755,-0.5958780247\H,18.0945207161,-0.8534209205,0.8  
144714743\H,17.4651786888,-2.4954856691,0.8509482533\H,18.7786267881,-  
3.032409104,-1.244557257\H,19.4351448043,-1.3945480204,-1.23722542\C,2  
0.1566902932,-2.6416415468,0.3284447789\C,21.4522615944,-3.0546109143,  
-0.4205547558\C,22.5325996986,-3.7649842126,0.4499481419\C,23.94679651



05,-3.7844268416,-0.2082689185\C,24.915523099,-4.8276802553,0.42025031  
91\C,26.4097673218,-4.6059620001,0.0595999053\C,-24.874930047,-4.82974  
38887,-0.4256452108\C,-26.2412447495,-4.970239989,0.298775292\F,27.114  
656405,-5.6752908343,0.4487583158\F,26.8899774333,-3.524611325,0.68213  
31968\F,26.5526598961,-4.4515720684,-1.2641327106\F,24.8101544345,-4.7  
836067885,1.7696397822\F,24.5658043325,-6.0579602419,-0.015373299\F,24  
.4936360499,-2.5524098423,-0.0755774375\F,23.822724515,-4.0736454497,-  
1.5253558347\F,22.6393354061,-3.1344207725,1.6411769499\F,22.134502641  
1,-5.0429362763,0.6579630486\F,21.9941940966,-1.9318962114,-0.96443153  
13\F,21.1149924762,-3.9016376746,-1.4280518115\F,20.4894168847,-1.6383  
413497,1.1938688147\F,19.754036854,-3.7157728268,1.0762342452\F,-26.85  
43471481,-3.7853865861,0.3864657512\F,-26.0671041713,-5.4679482504,1.5  
310213972\F,-25.0935508351,-4.1661628376,-1.5857191154\F,-24.352159594  
8,-2.9881963083,0.9658232165\F,-24.4273957409,-6.0746843415,-0.7004573  
374\F,-23.3634038343,-4.9162248285,1.3782680434\F,-22.9468687122,-2.53  
76829769,-1.1682640237\F,-22.2233977977,-4.6174456535,-1.2978798977\F,  
-20.7634327569,-4.4214410143,0.8391992124\F,-21.7144161305,-2.53864740  
79,1.4883910435\F,-20.7270791306,-1.2002596015,-0.5828810854\F,-19.985  
1563768,-3.0490067837,-1.5315934224\F,-27.0187925982,-5.8067647294,-0.  
3995267859\C,0.0560339486,8.7069239176,0.2927179993\F,-1.052784126,9.2  
617058256,-0.2230317416\F,0.1034754828,9.0246856003,1.6034982058\F,1.1  
216515537,9.2636633886,-0.3023042421\\Version=ES64L-G09RevD.01\State=2  
-A\HF=-5684.6125546\S2=0.769129\S2-1=0.\S2A=0.750184\RMSD=3.859e-09\RM  
SF=3.599e-06\Dipole=0.0959674,-1.3715447,-0.14638\Quadrupole=7.6829301  
, -20.1830598,12.5001297,3.9417297,-26.491426,-1.0960826\PG=C01 [X(C53H  
40F29N4O7)]\

## 2[8,4]a

1\1\GINC-LOCALHOST\FOpt\UB3LYP\6-31G(d)\C53H32F37N4O7(2)\PIOTR\19-Feb-  
2016\0\#\# UB3LYP/6-31G\* FOpt geom=(nodistance,noangle) fcheck SCF=dir  
ect\1,5-(4-F(CF2)8(CH2)4O-C6H4COOC6H4)-3-CF3 oxoverdazyl, C2 pseudosy  
mm\0,2\O,0.0281651506,3.5120018289,-0.0137219285\C,0.0219460802,4.726  
7776477,0.0125822811\N,-1.1538506924,5.487462085,0.146509828\N,-1.1772  
681939,6.853396561,0.1562119119\C,0.0093687579,7.4307092833,0.06808989  
87\N,1.2014848155,6.8700421349,-0.0409898516\N,1.1900301509,5.50407681  
69,-0.0876224024\C,2.4881656738,4.8930544819,-0.1530478567\C,2.7114572  
888,3.7102567777,-0.8681619225\C,3.9947647068,3.1756742509,-0.91944260  
32\C,5.0512013305,3.8159877812,-0.2726907758\C,4.8391678714,5.00622877  
53,0.4256786547\C,3.5547964384,5.5378964482,0.4843031069\C,-2.44713805  
83,4.8640941288,0.1844949291\C,-3.5214325186,5.5368250286,-0.410271718  
2\C,-4.802416316,4.9952250848,-0.3733668927\C,-5.0038344595,3.76756675  
44,0.2604737912\C,-3.9397313675,3.0987534962,0.864362384\C,-2.65952913  
5,3.6422977293,0.8347542425\O,-6.2514030602,3.1775069564,0.4156336312\  
O,6.3030576747,3.2412272681,-0.4497693017\C,-7.1733182085,3.1562604986  
, -0.6068525192\O,-6.972249899,3.6359046001,-1.7009469537\O,7.000619737  
7,3.5832787746,1.6963870444\C,7.214467684,3.1652680392,0.5796804445\C,  
-8.4179602804,2.472602821,-0.1906895351\C,-9.4474697668,2.3599315109,-  
1.1331233422\C,-8.6095605045,1.9354626271,1.0952246567\C,-10.646144014  
9,1.72766942,-0.8167601486\C,-9.7990607393,1.3055227228,1.421719571\C,  
-10.8266451591,1.1954701997,0.4688605043\C,8.465133375,2.5078866216,0.

1400397724\C,9.484252567,2.3449547122,1.0864150333\C,8.6721439959,2.04  
2549416,-1.1712102093\C,10.6873484541,1.7321361997,0.7494659174\C,9.86  
62094565,1.4324454809,-1.5182401994\C,10.8829532433,1.2708200265,-0.56  
1106541\O,-11.9503555156,0.5587627327,0.8896861621\O,12.01198034,0.657  
9120145,-1.0026712501\C,-13.0368053155,0.3854286189,-0.021275366\C,-14  
.1375788444,-0.3610875203,0.720877088\C,13.0862779344,0.4334637422,-0.  
0884414251\C,14.1936092748,-0.2800480822,-0.8529169207\H,3.3757089675,  
6.4637952089,1.0170532063\H,5.6572845901,5.5019990739,0.9299626139\H,4  
.1881994613,2.2602113674,-1.4687771074\H,1.8974245691,3.207777078,-1.3  
707248457\H,-1.8399262551,3.1176818756,1.3043140796\H,-4.1247981169,2.  
1536616429,1.3641821697\H,-5.6263003901,5.5133836702,-0.8446793357\H,-  
3.3505301062,6.4920260686,-0.8914888126\H,-9.2932912688,2.7766888983,-  
2.1230618503\H,-7.8203801615,2.0156566595,1.833828902\H,-11.4249746059  
,1.6547818965,-1.5665944487\H,-9.9628795211,0.8861101113,2.4091497867\  
H,9.3183468947,2.706736465,2.095875801\H,7.8911923713,2.1624344879,-1.  
913189295\H,11.4579794341,1.6194687233,1.5028157353\H,10.041677962,1.0  
677661204,-2.5252053504\H,-12.7007841803,-0.1846374755,-0.8991336144\H  
, -13.3947055017,1.3649191337,-0.3690069859\H,-13.7281837184,-1.3091872  
261,1.0917347547\H,-14.426168995,0.2253699436,1.6023419106\H,12.736962  
3427,-0.1787586235,0.7551339192\H,13.4435230895,1.3924781896,0.3129872  
648\H,13.7858063143,-1.2074446062,-1.2744344816\H,14.4954306339,0.3473  
545804,-1.7010905798\C,-15.3589403865,-0.6217607311,-0.1685027928\C,-1  
6.466009606,-1.3683153864,0.5888998806\H,-15.0647897896,-1.2123876359,  
-1.0448417114\H,-15.7592578398,0.3262793783,-0.5468952728\C,-17.665363  
3409,-1.6668178939,-0.2956463026\H,-16.0931325155,-2.3191846513,0.9817  
050848\H,-16.8181156443,-0.7774263679,1.4419214758\C,-18.8352290365,-2  
.3519417835,0.4615543394\C,-19.9765173744,-2.9149158718,-0.4380626075\  
C,-21.2904194949,-3.2266800157,0.3455149436\C,-22.2671668862,-4.165585  
0915,-0.4296921865\C,-23.7220943076,-4.1421456511,0.1335031283\C,15.40  
24768219,-0.5881360429,0.0384470578\C,16.5142429168,-1.3085383224,-0.7  
371925642\H,15.0938390343,-1.2146026503,0.8843478906\H,15.8039792355,0  
.339663751,0.4629530267\C,17.7024041831,-1.6483996752,0.1475919871\H,1  
6.1412852849,-2.2407295107,-1.172380293\H,16.8784799694,-0.685145883,-  
1.5614954938\C,18.8749551323,-2.3149350108,-0.622011696\C,20.003029784  
5,-2.9178355018,0.2683089399\C,21.3218034198,-3.2139738549,-0.51313441  
44\C,22.2834770361,-4.1864766927,0.2391801667\C,23.7439664384,-4.15627  
71232,-0.3090791758\C,24.5955561657,-5.3854203841,0.1213108178\C,26.12  
39285488,-5.2077574542,-0.090208726\C,-24.5882191375,-5.3490007584,-0.  
3296523812\C,-26.1128530615,-5.1665345305,-0.0963233655\F,26.726865567  
, -6.3887836185,0.0906488214\F,26.6226144482,-4.330495333,0.7865884269\  
F,26.3753588308,-4.778362637,-1.3345963597\F,24.3894062712,-5.63156457  
47,1.4369626507\F,24.2025290165,-6.4570270047,-0.6012075204\F,24.34532  
21725,-3.0321082733,0.1459890277\F,23.7083483786,-4.1246317646,-1.6619  
845059\F,22.3195396997,-3.8476461377,1.5483985798\F,21.7977248224,-5.4  
434077539,0.1157083713\F,21.9644252176,-2.0408232431,-0.7208719367\F,2  
1.0135007185,-3.7714196443,-1.7071674768\F,20.2962887184,-2.0544687657  
,1.2665174404\F,19.5462856305,-4.0764302304,0.8011488746\F,-26.6130455  
716,-4.255501619,-0.9370820566\F,-26.3480961688,-4.7784632769,1.164694  
6219\F,-24.3973770343,-5.5517081937,-1.654977602\F,-24.3181945858,-2.9  
983787196,-0.2774958347\F,-24.1968817315,-6.447763213,0.3518152105\F,-  
23.6733357143,-4.1565421213,1.4863051119\F,-22.3127722637,-3.782506635

5,-1.726359783\F,-21.7906935946,-5.4297881265,-0.3532779417\F,-20.9756  
787298,-3.8263815181,1.5171962949\F,-21.9212745499,-2.0560519197,0.598  
5870936\F,-20.2716839205,-2.0157445678,-1.4035505396\F,-19.5344454581,  
-4.0583016329,-1.0143169022\F,-26.727430325,-6.3357485493,-0.311572150  
8\C,0.0007430975,8.949966496,0.1676130873\F,-1.1107727447,9.4635240474  
, -0.3837922772\F,0.0362803559,9.3383670445,1.4594977555\F,1.0639384855  
,9.4853589051,-0.4506468704\F,-19.3625040521,-1.4418453894,1.323430551  
4\F,-18.3296809472,-3.38683355,1.1824081348\F,-17.3038527862,-2.489992  
0277,-1.327956976\F,-18.1495257791,-0.5115559603,-0.8400334597\F,18.36  
92900669,-3.3198903922,-1.3839915147\F,19.4175186726,-1.378974128,-1.4  
458287537\F,18.1893381032,-0.5173200676,0.7383225659\F,17.3243333202,-  
2.5056020175,1.1457106698\\Version=ES64L-G09RevD.01\State=2-A\HF=-6478  
.4723288\S2=0.769123\S2-1=0.\S2A=0.750186\RMSD=1.534e-09\RMSF=9.224e-0  
7\Dipole=0.018157,-1.3637578,-0.0765845\Quadrupole=18.4307738,-26.6472  
131,8.2164393,0.8088931,-22.4579861,-1.413072\PG=C01 [X(C53H32F37N4O7)  
J\\

## 2[8,6]a

1\1\GINC-LOCALHOST\FOpt\UB3LYP\6-31G(d)\C57H40F37N4O7(2)\PIOTR\25-Feb-  
2016\0\#\#P UB3LYP/6-31G\* FOpt geom=(nodistance,noangle) fcheck SCF=dir  
ect\\1,5-(4-F(CF2)8(CH2)6O-C6H4COOC6H4)-3-CF3 oxoverdazyl, C2 pseudosy  
mm\\0,2\O,-0.0171170987,3.917647872,0.0400032186\C,-0.0091275425,5.132  
4295256,0.0158486034\N,1.1668963176,5.891588814,-0.1242952133\N,1.1926  
27229,7.2574998834,-0.1297870945\C,0.0074061257,7.8364993323,-0.032985  
1764\N,-1.1850521293,7.2775017131,0.081225477\N,-1.1752725479,5.911417  
1859,0.1248176408\C,-2.4736679025,5.3016380626,0.1957720362\C,-2.69510  
16216,4.121273893,0.9152306207\C,-3.9783032127,3.5866774655,0.97142143  
\C,-5.0360486464,4.2250295594,0.3250418175\C,-4.8256646563,5.413094814  
7,-0.3773966979\C,-3.5416399577,5.9448829928,-0.4408995468\C,2.4585787  
257,5.2657531469,-0.1738620671\C,3.5379629964,5.9321045311,0.418783671  
7\C,4.8173561457,5.3876953796,0.3702662571\C,5.0120799325,4.1639260825  
, -0.2731444685\C,3.9426585927,3.5015290971,-0.8747605883\C,2.663935713  
,4.0478165292,-0.833428474\O,6.2575404564,3.573080388,-0.4398025519\O,  
-6.2884452916,3.6525087029,0.5045973721\C,7.1818156194,3.5369333867,0.  
5808346824\O,6.9826601374,4.0029574261,1.6812264207\O,-6.9638253262,3.  
9560230112,-1.6541881277\C,-7.190048067,3.5574359477,-0.5327804923\C,8  
.4240708699,2.856639706,0.1538322819\C,9.4539431522,2.7271011024,1.093  
8637747\C,8.6139653617,2.3382079433,-1.1401411921\C,10.6506662322,2.09  
64895198,0.7676329042\C,9.8016872423,1.710373229,-1.4765138966\C,10.83  
00382952,1.5828738983,-0.5260879422\C,-8.4443049313,2.9068252271,-0.09  
50259108\C,-9.4512089284,2.7217381991,-1.0505185635\C,-8.6672773088,2.  
4684273019,1.2230146504\C,-10.6568392727,2.1128618423,-0.7163150154\C,  
-9.8641773092,1.8625236381,1.5673465569\C,-10.8686833964,1.6774778992,  
0.6010154668\O,11.9510205268,0.9502079142,-0.9564268819\O,-12.00057809  
43,1.0701158419,1.03952405\C,13.037833729,0.7576619346,-0.0472542549\C  
,14.1389723542,0.0198302482,-0.7964263005\C,-13.0625233758,0.822928826  
9,0.1142824661\C,-14.1780811013,0.1135916516,0.8694800449\H,-3.3636323  
849,6.8690568031,-0.9770624912\H,-5.6454221678,5.9069161198,-0.8811735  
654\H,-4.1704435693,2.6728029416,1.5238410688\H,-1.8795605925,3.620424  
2098,1.4171147284\H,1.8399868305,3.5282223425,-1.3010708061\H,4.122470

259,2.5593224644,-1.3818925486\H,5.6455578594,5.9006022873,0.839856032  
7\H,3.3721404558,6.8844835356,0.9073730027\H,9.3012771523,3.1294312405  
,2.0900139384\H,7.8246760069,2.4313744191,-1.8771479451\H,11.429593411  
5,2.0101329958,1.5158517122\H,9.9640779334,1.3054426456,-2.4702207349\  
H,-9.273391777,3.0631089601,-2.065071195\H,-7.8962317093,2.6059050719,  
1.9723284132\H,-11.4176893504,1.982767155,-1.4766602001\H,-10.05161432  
14,1.5183354878,2.5793687876\H,12.6966409991,0.1756774895,0.8208153898  
\H,13.3964189816,1.7310656683,0.3166898367\H,13.7274871607,-0.92024561  
03,-1.18541232\H,14.4333580584,0.6194422453,-1.6671880883\H,-12.695158  
7438,0.2011851199,-0.7145920279\H,-13.4179937981,1.7741159424,-0.30711  
64004\H,-13.7725751633,-0.8064130135,1.3094033532\H,-14.4967013071,0.7  
493488447,1.7053077007\C,15.3596180395,-0.2646804554,0.0878657652\C,16  
.4780711556,-1.0030136099,-0.6592644761\H,15.0518606786,-0.8614117874,  
0.9587548449\H,15.7549571225,0.6801296779,0.4882109597\C,17.6910648823  
, -1.3049910633,0.2289577769\H,16.081419713,-1.942808648,-1.0696170267\  
H,16.796153429,-0.4019975465,-1.5232993225\C,18.8005168504,-2.04133817  
36,-0.5354583553\C,19.9896792616,-2.37319188,0.3502545983\C,21.1581654  
201,-3.0548519803,-0.4124001945\C,22.2869524912,-3.6489857642,0.482848  
9871\C,23.6023509331,-3.9607522442,-0.298320659\C,-15.3747643,-0.21508  
4695,-0.0322402631\C,-16.5037658853,-0.9398046204,0.7122937578\H,-15.0  
404338057,-0.8380339668,-0.874494536\H,-15.7694724067,0.7111840558,-0.  
4743281495\C,-17.694681935,-1.2752962079,-0.1936959329\H,-16.109605848  
6,-1.8646561356,1.157517521\H,-16.8448948732,-0.3170663187,1.551746886  
1\C,-18.8117878689,-2.0084760889,0.5626092061\C,-19.9825922312,-2.3618  
690457,-0.3391639612\C,-21.1553746557,-3.0516654266,0.4095309594\C,-22  
.2630028784,-3.6641670642,-0.499629357\C,-23.5861054736,-3.989088974,0  
.2629338269\C,-24.5226384672,-4.9698514295,-0.5100901492\C,-25.9898270  
972,-4.9693888896,0.020874159\C,24.5627716627,-4.926504353,0.464165318  
9\C,26.0214779642,-4.9100025465,-0.0895292876\F,-26.6049696859,-3.8511  
957991,-0.4306236223\F,-25.9712649961,-4.9504767904,1.3743495969\F,-24  
.5493918232,-4.6191740937,-1.8163938436\F,-24.0179764386,-6.2199949015  
, -0.3929205614\F,-24.2509203285,-2.8288358205,0.4737906887\F,-23.28391  
22502,-4.5530957635,1.4554739915\F,-22.5593014594,-2.7967887068,-1.493  
4679676\F,-21.7821432199,-4.8107318374,-1.0376399621\F,-21.7238072905,  
-2.1310590575,1.2335309938\F,-20.6459830039,-4.0557363979,1.1705017169  
\F,-20.4807270557,-1.2354522976,-0.9300288358\F,-19.5796142121,-3.2079  
30661,-1.3374480652\F,26.6293508489,-3.7822565377,0.347809613\F,25.981  
6676938,-4.8970746637,-1.4426387241\F,24.6052883318,-4.5698125663,1.76  
84322226\F,24.2493191642,-2.7931907362,-0.5238295897\F,24.0719291426,-  
6.1832786245,0.3599986492\F,23.2891868882,-4.5334177689,-1.4838940022\  
F,22.5871766253,-2.7732503587,1.4681364221\F,21.8286686609,-4.79881659  
26,1.0333726333\F,20.6482283234,-4.0695090548,-1.1588062119\F,21.70281  
48882,-2.1332383695,-1.2512706531\F,20.4840673047,-1.2364196636,0.9241  
394894\F,19.6128939438,-3.2158851878,1.3615409122\C,0.0182244746,9.356  
0168575,-0.1275785269\F,1.1325104879,9.8658660895,0.4218013125\F,-0.02  
09938493,9.749047493,-1.4180006581\F,-1.0419206561,9.8912326069,0.4960  
827256\C,-26.8153408004,-6.2084074272,-0.4315232118\C,-28.3489365547,-  
6.0580220832,-0.2376470396\C,26.8696277907,-6.1365146089,0.3548682614\  
C,28.3978205102,-5.9685757319,0.1344970357\F,-28.8513727548,-5.1808359  
819,-1.1124034096\F,-28.6231902968,-5.6448550788,1.007424634\F,-28.929  
8167544,-7.2471233734,-0.4371801827\F,-26.5890077848,-6.4388606413,-1.

7467185935\F,-26.4137466927,-7.2802442827,0.2860024716\F,26.4693122584  
, -7.2167624297, -0.3506493816\F, 26.6681066487, -6.3631003914, 1.674749723  
9\F, 28.6460953416, -5.5592249369, -1.1172703853\F, 28.9040792047, -5.08038  
42343, 0.9958339434\F, 28.9964857332, -7.1493953669, 0.3307724383\H, -18.09  
95010827, -0.3552490576, -0.6318497186\H, -17.3586471658, -1.900181922, -1.  
0302715849\H, -18.4358626897, -2.9366733371, 1.0042467285\H, -19.196910678  
4, -1.3899077886, 1.3813287761\H, 17.3797393971, -1.9155901867, 1.085477635  
\H, 18.0942001332, -0.3713249411, 0.6389212739\H, 19.1662689008, -1.4323262  
877, -1.3700730955\H, 18.4242272998, -2.9788961683, -0.9565745779\Version  
=ES64L-G09RevD.01\State=2-A\HF=-6635.7288679\S2=0.769119\S2-1=0.\S2A=0  
.750185\RMSD=4.178e-09\RMSF=1.101e-06\Dipole=-0.0260768, -1.360214, 0.07  
22637\Quadrupole=11.030555, -26.0599152, 15.0293602, -0.7868851, -27.13735  
3, 1.0908952\PG=C01 [X(C57H40F37N4O7)]\

## 2[10,4]a

1\1\GINC-LOCALHOST\FOpt\UB3LYP\6-31G(d)\C57H32F45N4O7(2)\PIOTR\25-Feb-  
2016\0\#\#P UB3LYP/6-31G\* FOpt geom=(nodistance,noangle) fcheck SCF=dir  
ect\1,5-(4-F(CF2)10(CH2)4O-C6H4COOC6H4)-3-CF3 oxoverdazyl, C2 pseudos  
ymm\0,2\O,-0.0098339057,3.7287179639,0.0191451406\C,-0.0052953374,4.9  
437812519,0.0129859926\N,1.1699987327,5.7082134207,-0.1029589207\N,1.1  
913714724,7.0741678716,-0.0904644286\C,0.003573731,7.6482857088,0.0021  
220498\N,-1.188126882,7.0842251993,0.0969696378\N,-1.1749781186,5.7176  
769636,0.1207645843\C,-2.4727048095,5.1042820318,0.1705760457\C,-2.697  
7063384,3.9084917519,0.8632492554\C,-3.9810111521,3.3727305777,0.90102  
40736\C,-5.0358762168,4.0244485311,0.2631269315\C,-4.8220631093,5.2270  
881812,-0.4131680139\C,-3.5377157931,5.7600300592,-0.4583456967\C,2.46  
45716383,5.0877428561,-0.1450429137\C,3.5350813079,5.7536796448,0.4640  
834078\C,4.8174105894,5.2156280171,0.42388315\C,5.0241690032,3.9982511  
729,-0.2278444348\C,3.9638564362,3.3361635138,-0.8456322331\C,2.682254  
5189,3.876297166,-0.8127129892\O,6.2738942297,3.4141122956,-0.38788906  
14\O,-6.2881258813,3.4467834559,0.427272277\C,7.1935873685,3.382165617  
1,0.6363019551\O,6.9870710089,3.8430564584,1.737424134\O,-6.9849446282  
,3.833066454,-1.7116161223\C,-7.2001215149,3.3945092596,-0.6030578612\  
C,8.4436541031,2.7135019639,0.2121219401\C,9.4726165734,2.5946138834,1  
.1543843849\C,8.6413734561,2.1974711424,-1.0814851246\C,10.6769585021,  
1.9772829537,0.830177883\C,9.8364647685,1.5823418367,-1.4157392543\C,1  
0.8637916253,1.4666680082,-0.4632677903\C,-8.4537695058,2.7348488369,-  
0.1754726196\C,-9.4752658223,2.5980741296,-1.1234223874\C,-8.661921643  
7,2.2438293877,1.1261951232\C,-10.6821717628,1.9870095278,-0.797095072  
3\C,-9.8596676505,1.6349613708,1.4625689467\C,-10.8792300768,1.5007270  
715,0.5041969219\O,11.9937206143,0.8466802501,-0.8923469895\O,-12.0123  
765463,0.8880150061,0.9353575792\C,13.0826149643,0.6740928574,0.015815  
2042\C,14.1936384183,-0.0451363615,-0.7378612573\C,-13.0927713535,0.69  
72582915,0.0206811312\C,-14.208175895,-0.0144618684,0.7749730363\H,-3.  
3574660937,6.6955025895,-0.9736665961\H,-5.6387375937,5.7317892277,-0.  
9108437406\H,-4.1757295169,2.4474627879,1.4332140026\H,-1.8850482587,3  
.3971939065,1.3590702043\H,1.8656893126,3.3569664855,-1.2932906359\H,4  
.15298189,2.3991900833,-1.3590360614\H,5.6382348594,5.7285259773,0.906  
1561079\H,3.3601999194,6.7011033948,0.9590239413\H,9.313611479,2.99488  
38078,2.1503432071\H,7.852644591,2.2826069092,-1.8200226494\H,11.45526

10425,1.8992294077,1.5800379392\H,10.0051482834,1.1795307676,-2.409243  
0106\H,-9.3083289908,2.9792974367,-2.1255293595\H,-7.8791094205,2.3431  
774002,1.8692500867\H,-11.4545879227,1.8949960565,-1.5514156842\H,-10.  
0362058356,1.2510269511,2.4621625078\H,12.7546200852,0.0860540153,0.88  
48411336\H,13.4271090033,1.652924322,0.3785874408\H,13.7985931963,-0.9  
939516301,-1.1221889787\H,14.4721468652,0.5585059521,-1.6109739971\H,-  
12.7551482579,0.0969980383,-0.8361924666\H,-13.4373275942,1.6691404104  
, -0.360327365\H,-13.8141228437,-0.957022479,1.1753818768\H,-14.4958567  
773,0.6001358534,1.637376992\C,15.4200245704,-0.2993367148,0.146458551  
\C,16.5403997661,-1.0111703213,-0.6246021939\H,15.1374019288,-0.910849  
6346,1.0122788878\H,15.802777703,0.6490771291,0.5416669226\C,17.744991  
5032,-1.3053184281,0.2542779412\H,16.1849579599,-1.9608445772,-1.03605  
03643\H,16.8816992822,-0.3975414701,-1.4659188507\C,18.9322042145,-1.9  
405212727,-0.5190767245\C,20.0837519622,-2.5036336254,0.3674760772\C,2  
1.4092898785,-2.7525651472,-0.4188727871\C,22.4071814669,-3.6921229737  
,0.328790369\C,23.8659945135,-3.6026909345,-0.2203579048\C,-15.4259606  
214,-0.2834211256,-0.1168861234\C,-16.5498832149,-0.9929627132,0.65112  
44577\H,-15.133133533,-0.9020943642,-0.9741642595\H,-15.8095703511,0.6  
592806268,-0.5247279722\C,-17.7467367534,-1.2968506408,-0.2350347217\H  
, -16.1947022882,-1.9385062314,1.0721823697\H,-16.8996019189,-0.3742396  
127,1.4852154515\C,-18.9366250787,-1.934638621,0.5320725835\C,-20.0792  
042199,-2.5058132302,-0.3609396442\C,-21.4090363834,-2.7591923661,0.41  
66195986\C,-22.3974307796,-3.7045912944,-0.3363604181\C,-23.8605920542  
, -3.620280438,0.2018072098\C,-24.7471943141,-4.8312115605,-0.227238821  
7\C,-26.2759467109,-4.5646881721,-0.0680377664\C,24.7607088266,-4.8093  
115417,0.2038397638\C,26.287147337,-4.5372152068,0.032116446\F,-26.675  
7189629,-3.7669183034,-1.0858542926\F,-26.494133935,-3.9291912253,1.10  
70095134\F,-24.5030956977,-5.1150467388,-1.5273747005\F,-24.4086393319  
, -5.8964181437,0.5352162588\F,-24.420379962,-2.481992169,-0.2688603639  
\F,-23.8294465803,-3.578728999,1.5537921393\F,-22.4117591296,-3.374605  
386,-1.6480774064\F,-21.9553917317,-4.9762370856,-0.199331668\F,-22.01  
62189931,-1.5661935964,0.6180786685\F,-21.121884321,-3.3216599773,1.61  
34850576\F,-20.3427353417,-1.6370418315,-1.3627075871\F,-19.6558456525  
, -3.6793192045,-0.8886810209\F,26.6919636827,-3.7364502731,1.045572303  
7\F,26.4936417751,-3.9026123896,-1.1455141651\F,24.5279359534,-5.09166  
25918,1.5063739266\F,24.4246132266,-2.4614358337,0.2444618526\F,24.420  
3336851,-5.8772528959,-0.5539641509\F,23.8246527292,-3.5633092787,-1.5  
721382559\F,22.4297092187,-3.3592909359,1.6396741049\F,21.9695479241,-  
4.9659110776,0.1976345941\F,21.1163001527,-3.3185328929,-1.6126790008\  
F,22.0096909246,-1.5572388289,-0.6267324473\F,20.3500622913,-1.6309178  
287,1.3650664628\F,19.669794131,-3.6777075942,0.9013442418\C,0.0102965  
655,9.1689835785,-0.0724412275\F,1.1192363176,9.6750323346,0.490941070  
5\F,-0.0216340246,9.578458612,-1.357898792\F,-1.0557099785,9.692632922  
4,0.551024996\F,19.4403099987,-0.9928034305,-1.3514608258\F,18.4531853  
659,-2.9646371333,-1.272591285\F,17.4016044245,-2.164844583,1.26284598  
81\F,18.2010145969,-0.1544025956,0.8311912872\F,-18.4584910233,-2.9540  
595305,1.2924897436\F,-19.4549707389,-0.9864147737,1.3575064119\F,-18.  
2039407382,-0.150510242,-0.8200924675\F,-17.3919388349,-2.1589471739,-  
1.237439005\C,-27.1373714004,-5.8608671053,-0.0814904198\C,-28.6532352  
17,-5.6136805745,-0.3113874497\C,27.1534640374,-5.8301771164,0.0405798  
077\C,28.6702201648,-5.5771795295,0.2578783737\F,-28.8827346867,-5.238

3319818,-1.573689795\F,-29.1007344647,-4.6623358284,0.5197812148\F,-29.3199356408,-6.748575621,-0.070469647\F,-26.6999630278,-6.677660977,-1.0692081604\F,-26.9964222746,-6.483539719,1.1087505386\F,27.0052321121,-6.4551872744,-1.1475550738\F,26.7269954325,-6.6470455644,1.0330160577\F,29.1077393562,-4.6260182517,-0.5787909615\F,28.9084595204,-5.1984294015,1.5175427111\F,29.338952352,-6.7102371003,0.013952157\\Version=ES64L-G09RevD.01\State=2-A\HF=-7429.5885965\S2=0.769119\S2-1=0.\S2A=0.750186\RMSD=1.531e-09\RMSF=8.823e-07\Dipole=-0.0144035,-1.366898,0.0547187\Quadrupole=18.4050823,-27.7624088,9.3573265,-0.3293776,-21.3853485,0.9198822\PG=C01 [X(C57H32F45N4O7)]\\

## 2[6,6]b

1\1\GINC-LOCALHOST\FOpt\UB3LYP\6-31G(d)\C56H43F26N4O7S1(2)\PIOTR\12-Fe b-2016\0\#\# UB3LYP/6-31G\* FOpt geom=(nodistance,noangle) fcheck SCF=direct\\1,5-(4-F(CF2)(CH2)6O-C6H4COOC6H4)-3-Thienyl oxoverdazyl, C2 pseudosymm\\0,2\O,-0.0573161635,-0.3178778888,0.283930584\C,-0.0503152232,0.8959865389,0.1837926619\N,1.1212355327,1.6508707287,0.0277001495\N,1.1452130494,3.0156683987,-0.0455415696\C,-0.0414381067,3.6207158082,-0.0183606854\N,-1.2374199433,3.0375149392,0.0862071444\N,-1.2169456346,1.6758277035,0.2097049494\C,-2.5123917859,1.0600004405,0.260508776\C,-2.7642261847,-0.0597384219,1.0615862076\C,-4.045114967,-0.6035417899,1.0945744554\C,-5.0697405144,-0.0320975671,0.3425028085\C,-4.8302389393,1.0941476806,-0.445807337\C,-3.5488063079,1.6344013714,-0.4849233216\C,2.4137976812,1.0267482188,0.0279769903\C,3.4859276797,1.7188690882,0.6033675988\C,4.7680379871,1.1772275611,0.5924184213\C,4.972441341,-0.0721329552,0.0040650588\C,3.9099088418,-0.7639679968,-0.5764703923\C,2.6297624134,-0.2199462901,-0.5722951247\O,6.2201925551,-0.6690442135,-0.1326100027\O,-6.3329760037,-0.5925065027,0.4988270672\C,7.1628434121,-0.6284969411,0.8674484474\O,6.988306722,-0.0839326907,1.9358997879\O,-6.802312077,-0.6075877776,-1.7336047808\C,-7.1353272358,-0.8400405198,-0.5922291213\C,8.3992810116,-1.3354221531,0.463598859\C,9.4559489453,-1.3820389528,1.3811216557\C,8.5573098191,-1.9568351166,-0.788570392\C,10.6488215193,-2.0295961981,1.0730458409\C,9.739745509,-2.6041798533,-1.1060083822\C,10.79540948,-2.6470680646,-0.1785532068\C,-8.4335772785,-1.4219719799,-0.1849805656\C,-9.3442794275,-1.7557459985,-1.1948157968\C,-8.7908551587,-1.6487775812,1.1565075884\C,-10.5867990813,-2.3033885433,-0.8907911673\C,-10.0259985601,-2.1913206423,1.4710807477\C,-10.934888842,-2.5229509572,0.4509322083\C,-0.0352333863,5.0821333166,-0.1150774094\C,-1.1099431744,5.936713788,-0.041701825\S,1.4559380368,5.9618083409,-0.3489666763\C,-0.7410731541,7.3049225937,-0.1730184907\C,0.6075404261,7.4725360883,-0.3435966761\O,11.9083432275,-3.3076450593,-0.5885582955\O,-12.1173917146,-3.0467595942,0.8645200575\C,13.0324738981,-3.3987394321,0.2899293159\C,14.1113606333,-4.1959859004,-0.4302976904\C,-13.0996079097,-3.4028097611,-0.1114234034\C,-14.3181237585,-3.9361574963,0.6292993814\H,-3.3455150406,2.5103039926,-1.0889285054\H,-5.6261181331,1.5325786621,-1.0334521579\H,-4.2602849858,-1.4711053679,1.7097320068\H,-1.9712670632,-0.5078420803,1.6435880083\H,1.8110170855,-0.7626547734,-1.0226273489\H,4.0970505303,-1.7273269336,-1.0394772042\H,5.5894154118,1.7126652684,1.0482823095\H,3.3125917161,2.6903361679,1.0496598783\H,9.3276282042,-0.9006535614,2.3451415958\H,7.7473117

614,-1.9279946482,-1.5081866133\H,11.4497186982,-2.0492898044,1.802805  
6904\H,9.8773571661,-3.0884830093,-2.0674408539\H,-9.0619320996,-1.578  
795645,-2.2275123183\H,-8.094413852,-1.395080652,1.947456016\H,-11.270  
4969771,-2.553469233,-1.6933079818\H,-10.3177470324,-2.3704937191,2.50  
09464507\H,-2.1231218998,5.5827309186,0.1057601157\H,-1.4483211285,8.1  
264685953,-0.1400881395\H,1.1554281388,8.3974614846,-0.4667029355\H,12  
.7359753009,-3.8960366079,1.2244561566\H,13.3911363474,-2.3902942146,0  
.5413680611\H,13.7039967984,-5.18232224,-0.6868051748\H,14.3423550349,  
-3.6942895001,-1.378597542\H,-12.6898119353,-4.1641629762,-0.790602129  
\H,-13.3641068273,-2.5206368398,-0.7118478191\H,-14.0111401432,-4.7935  
698064,1.2415881782\H,-14.6719023932,-3.163018951,1.3232609721\C,15.38  
686553,-4.3531087954,0.4071644478\C,16.4671269012,-5.1757041508,-0.307  
3109332\H,15.1429495294,-4.8324465886,1.3663113511\H,15.7907687963,-3.  
3606360579,0.654251241\C,17.7523865086,-5.3226523559,0.5162339941\H,16  
.066480806,-6.172244908,-0.5427497071\H,16.7033746263,-4.7052318165,-1  
.2726171059\C,18.8079590539,-6.1702261474,-0.2080403419\H,18.170268435  
, -4.332264822,0.7329755129\H,17.5227622104,-5.7858316432,1.4837074215\  
H,18.4227160633,-7.1738297327,-0.4137720603\H,19.0739335785,-5.7193385  
876,-1.1709674864\C,20.0868642979,-6.316778557,0.5992434773\C,21.18746  
50585,-7.1348199968,-0.1292512873\C,22.4223174042,-7.5225462514,0.7383  
255961\C,23.652537024,-7.9882045798,-0.1009127404\C,-15.4458815022,-4.  
3448320787,-0.3268078238\C,-16.6891799198,-4.8712820907,0.4019496405\  
H,-15.0799418108,-5.116110747,-1.02005015\H,-15.7306994663,-3.484310225  
7,-0.9494600132\C,-17.812493152,-5.2783524924,-0.5592242658\H,-16.4089  
82412,-5.7321616223,1.0257988486\H,-17.058797095,-4.0998206929,1.09289  
9259\C,-19.0574250843,-5.786967625,0.1817015811\H,-18.0909827254,-4.42  
38286644,-1.1872828724\H,-17.4539049395,-6.0625218625,-1.2374926075\H,  
-18.8068199896,-6.6376383865,0.8232869303\H,-19.4718816315,-5.00321776  
13,0.826160671\C,-20.1536510045,-6.2308144533,-0.7724357539\C,-21.4621  
327523,-6.6622977515,-0.0570624503\C,-22.5193627408,-7.3662836549,-0.9  
604458841\C,-23.9469210623,-7.4042264512,-0.3325218604\C,-24.895131727  
2,-8.4444036223,-0.9964393115\C,-26.3981683489,-8.2375815667,-0.664683  
4314\C,24.7191063394,-8.7598495249,0.7289361046\C,26.0939460312,-8.905  
3729677,0.021859527\F,-27.0873011401,-9.3058459149,-1.0838955738\F,-26  
.872359552,-7.1505777866,-1.2820013183\F,-26.5702918975,-8.1030380646,  
0.6577348987\F,-24.7614179407,-8.3801492156,-2.342507532\F,-24.5465451  
958,-9.6785957825,-0.5710987002\F,-24.4990836076,-6.1739194686,-0.4589  
248565\F,-23.8487328604,-7.7118565322,0.9825756357\F,-22.6052559633,-6  
.7186834378,-2.144213695\F,-22.1087952443,-8.6385236056,-1.1789147018\  
F,-22.0225775451,-5.5509088745,0.4912806673\F,-21.1409843952,-7.521891  
4932,0.9450395453\F,-20.4741856502,-5.2164297285,-1.629507248\F,-19.72  
93531975,-7.2913074032,-1.5276806015\F,26.7211098854,-7.7262843551,-0.  
0406557627\F,25.9319708348,-9.384057178,-1.2195448133\F,24.9286213805,  
-8.1154132484,1.9014242597\F,24.2365635306,-6.8927218356,-0.6427069701  
\F,24.254070435,-10.003502434,0.9794470871\F,23.2327024042,-8.80340677  
71,-1.097259532\F,22.8060501871,-6.4577975004,1.4780706187\F,22.057519  
6806,-8.530863504,1.5661472663\F,20.6309613433,-8.2864368768,-0.588564  
5607\F,21.6122559509,-6.40509329,-1.1954894479\F,20.6100995051,-5.0868  
024807,0.8817018599\F,19.8334464731,-6.9410404682,1.7911229673\F,26.85  
23815271,-9.7600174623,0.7192792552\\Version=ES64L-G09RevD.01\State=2-  
A\HF=-5899.3986253\S2=0.77503\S2-1=0.\S2A=0.750275\RMSD=1.312e-09\RMSF



=9.485e-07\Dipole=-0.326459,-0.0619198,0.0268608\Quadrupole=-8.4706465  
,9.7369103,-1.2662638,-6.9655273,-27.1811165,-1.2829901\PG=C01 [X(C56H  
43F26N4O7S1)]\

## 2[6,6]c

1\1\GINC-LOCALHOST\FOpt\UB3LYP\6-31G(d)\C58H45F26N4O7(2)\PIOTR\12-Aug-  
2016\0\#\#P UB3LYP/6-31G\* FOpt geom=(nodistance,noangle) fcheck SCF=dir  
ect\1,5-(4-F(CF2)(CH2)6O-C6H4COOC6H4)-3-Ph oxoverdazyl, C2 pseudosymm  
\0,2\O,0.0169665293,3.3652233325,-0.2635248678\C,0.0255194008,4.57618  
75734,-0.1332556265\N,-1.1337599732,5.3398415453,0.0640821703\N,-1.144  
6324576,6.7025250846,0.1732605987\C,0.0454629792,7.3019844771,0.141361  
6882\N,1.2277870769,6.7035858287,-0.0030220722\N,1.196920258,5.3462790  
68,-0.1625709054\C,2.4867069708,4.723152413,-0.2512308934\C,2.71515419  
61,3.6183085778,-1.0795831547\C,3.9910531264,3.0658669394,-1.147697843  
1\C,5.0337615933,3.6141865282,-0.4034525544\C,4.8175714915,4.725656266  
7,0.4120052591\C,3.5413003185,5.2743358683,0.4863770771\C,-2.431501551  
2,4.7270611957,0.0704644436\C,-3.5040767333,5.4342174065,-0.4849695773  
\C,-4.7911099691,4.9041843743,-0.4648922253\C,-4.9995729534,3.65023044  
85,0.1124058555\C,-3.9360975056,2.9424485962,0.6719504753\C,-2.6513843  
827,3.4753441906,0.6583912805\O,-6.2501275953,3.0615382958,0.258560062  
\O,6.289990078,3.0481510012,-0.5940296551\C,-7.2108007615,3.129076931,  
-0.7225530028\O,-7.0526929167,3.6946295053,-1.7826958577\O,6.794066110  
8,2.9769281932,1.6296678814\C,7.1074769063,2.7694233892,0.4779684195\C  
, -8.444321571,2.4221226144,-0.3099621538\C,-9.5183826447,2.4011740701,  
-1.2080591936\C,-8.5830478011,1.7761066364,0.9320294585\C,-10.70964306  
15,1.7551060347,-0.8907263056\C,-9.7636937959,1.1300851045,1.258556124  
3\C,-10.836897289,1.1130363316,0.3505823068\C,8.3952873762,2.188787308  
2,0.0368908305\C,9.3196390895,1.8266964941,1.0242913955\C,8.7299038946  
,1.9903486299,-1.3148745981\C,10.5537844891,1.2788351332,0.6882477726\  
C,9.9565186185,1.447744833,-1.6612466449\C,10.8793446914,1.0878461415,  
-0.6634499707\O,-11.9462885229,0.4513646272,0.7681154242\O,12.05209033  
28,0.566844779,-1.1074478442\C,-13.087460616,0.385040183,-0.0904678165  
\C,-14.1576018871,-0.419880375,0.6342542458\C,13.0478972001,0.18497873  
83,-0.1553797789\C,14.2521521171,-0.3371457248,-0.9267952022\H,3.35592  
29905,6.1384500848,1.1126956199\H,5.627568816,5.146017911,0.9935908277  
\H,4.1879842737,2.2095112598,-1.7843137467\H,1.9080464105,3.1879567999  
, -1.6555029792\H,-1.8318169019,2.9204170814,1.0923713881\H,-4.12634546  
82,1.9754816514,1.1260957618\H,-5.6128766949,5.4510735984,-0.906100968  
2\H,-3.3259446364,6.407939641,-0.9246945978\H,-9.4049476455,2.90134150  
04,-2.1643540644\H,-7.759471188,1.7847967173,1.6365905899\H,-11.524229  
566,1.7554595976,-1.6054515746\H,-9.8864896724,0.6269816129,2.21230811  
74\H,9.054685854,1.9818356939,2.0650698244\H,8.0226672989,2.2661076905  
, -2.0886824936\H,11.2484412232,1.0065537012,1.4739501758\H,10.23086860  
6,1.2903052894,-2.6994148727\H,-12.8119756282,-0.0951260372,-1.0402520  
264\H,-13.4441454294,1.4005742165,-0.3146985663\H,-13.7517521483,-1.41  
35771613,0.8632730232\H,-14.3672231675,0.0641574872,1.5965945578\H,12.  
6453523414,-0.589419838,0.5133084683\H,13.3260261964,1.0524888477,0.46  
00659746\H,13.9319287567,-1.1801237144,-1.5522096784\H,14.598045451,0.  
4492937859,-1.6096974908\C,-15.4499041217,-0.5526254058,-0.1813885217\  
C,-16.5214590553,-1.3825360565,0.5377380178\H,-15.2275726523,-1.014472

6373,-1.1542608473\H,-15.8520551987,0.4469641226,-0.4011294259\C,-17.8  
233955704,-1.5055432509,-0.2632173728\H,-16.1227438836,-2.3859088733,0  
.7458461623\H,-16.7359255668,-0.9296842021,1.5164645738\C,-18.87007141  
5,-2.3606433819,0.4651142313\H,-18.2390142342,-0.5085940601,-0.4524859  
27\H,-17.6156621485,-1.9511674902,-1.2437951898\H,-18.4873459309,-3.37  
0373481,0.6437799196\H,-19.1142579723,-1.9269821208,1.4416279348\C,-20  
.1654610753,-2.4837107956,-0.3194947307\C,-21.2568352281,-3.3088994003  
,0.4147902042\C,-22.5110934729,-3.6721597708,-0.4353513203\C,-23.72752  
29712,-4.1462554051,0.4191410558\C,15.3932344209,-0.7703277516,0.00233  
60889\C,16.6225935284,-1.2862818729,-0.7569403625\H,15.0350790681,-1.5  
545201178,0.6850809036\H,15.6915935427,0.0758144185,0.6382101821\C,17.  
7595062565,-1.7167608815,0.1776804101\H,16.3290664718,-2.1332731223,-1  
.3935371857\H,16.9841169723,-0.5022361844,-1.4379334518\C,18.990444783  
3,-2.2150383477,-0.5930533901\H,18.0514233667,-0.8760257286,0.81812558  
39\H,17.4086616445,-2.5130214468,0.845838005\H,18.7264346489,-3.052293  
323,-1.2467931008\H,19.3972934222,-1.4203256558,-1.2288745646\C,20.100  
288821,-2.6808233405,0.3345297969\C,21.3954714475,-3.1029850006,-0.409  
9882515\C,22.4647368611,-3.8272328199,0.4627103967\C,23.8817894513,-3.  
8579133735,-0.1889524433\C,24.8370445499,-4.9133319609,0.439900022\C,2  
6.335209715,-4.705083599,0.0876258971\C,-24.8151764148,-4.8954506294,-  
0.4038819126\C,-26.1767809239,-5.0459785606,0.3273428903\C,0.055765180  
9,8.7815109699,0.2841315346\C,1.2425904035,9.5047793001,0.0921798937\C  
, -1.1204870628,9.4719866988,0.6130024859\C,1.2502670594,10.8914733361,  
0.2275544894\C,-1.1072435682,10.8588298327,0.746709159\C,0.0767685714,  
11.573948917,0.5549641623\H,2.151082953,8.9722983736,-0.166092106\H,-2  
.0371070713,8.9135099439,0.7662683031\H,2.1755264966,11.4403847586,0.0  
740780211\H,-2.0245105846,11.3816950952,1.0039659106\H,0.0848703718,12  
.6556056434,0.6598106709\F,27.0273668245,-5.7831249422,0.4756713197\F,  
26.8231128636,-3.6312689414,0.7172147953\F,26.4863387146,-4.5464909774  
, -1.2346949165\F,24.7254264732,-4.873858656,1.7889321689\F,24.47733817  
17,-6.1382456393,-0.0026581377\F,24.440190953,-2.6319465353,-0.0485645  
134\F,23.7612372716,-4.1405114031,-1.5077978498\F,22.5720938156,-3.202  
3373879,1.6568776215\F,22.0533233603,-5.1020502867,0.6639031146\F,21.9  
508704992,-1.9832871232,-0.9464520515\F,21.0551032516,-3.9425515707,-1  
.4226696151\F,20.4383444147,-1.6841120603,1.2055009539\F,19.6843064516  
, -3.7541388188,1.0761724298\F,-26.7948870433,-3.8644608231,0.424566171  
\F,-25.9935666802,-5.5492294075,1.5560128237\F,-25.0434720456,-4.22756  
78775,-1.5596227651\F,-24.2936622294,-3.0577541296,0.9930407298\F,-24.  
3632075702,-6.1369320852,-0.6869577103\F,-23.2934156705,-4.9828249923,  
1.3913679182\F,-22.902355747,-2.5910074042,-1.1468177637\F,-22.1693227  
667,-4.6665613643,-1.2894136065\F,-20.6989125708,-4.4726029675,0.84070  
74769\F,-21.6556920122,-2.5973451663,1.5031069879\F,-20.6860833196,-1.  
2453105545,-0.5679193933\F,-19.9395182341,-3.0863779671,-1.5278902391\  
F,-26.9543222295,-5.8824885584,-0.3710157962\\Version=ES64L-G09RevD.01  
\State=2-A\HF=-5578.6444552\S2=0.772927\S2-1=0.\S2A=0.750237\RMSD=1.22  
8e-09\RMSF=1.518e-06\Dipole=0.1100559,-0.1432805,-0.0015853\Quadrupole  
=-7.4255408,6.5607764,0.8647644,4.5094057,-27.5997486,1.9681692\PG=C01  
[X(C58H45F26N4O7)]\

2[6,6]d

1\1\GINC-LOCALHOST\FOpt\UB3LYP\6-31G(d)\C58H44F27N4O7(2)\PIOTR\12-Aug-2016\0\#\#P UB3LYP/6-31G\* FOpt geom=(nodistance,noangle) fcheck SCF=direct\1,5-(4-F(CF2)6(CH2)6O-C6H4COOC6H4)-3-(PhF-m) oxoverdazyl, C2 pseudosymm\0,2\O,0.0153067231,3.3654857895,-0.2665743096\C,0.024682801,4.5757809654,-0.1351585452\N,-1.1351230581,5.3397902085,0.0622489734\N,-1.1451821529,6.7016571606,0.1753411576\C,0.0454907668,7.2986664211,0.1428663691\N,1.2275368155,6.7019492151,-0.0040742337\N,1.1971072706,5.3451564415,-0.1631503993\C,2.4866791659,4.7210564905,-0.2520389995\C,2.7151187463,3.6205630337,-1.0859803562\C,3.9903658852,3.0667954347,-1.1540789302\C,5.0321361784,3.6097297089,-0.4043615516\C,4.8155881206,4.7171087186,0.4167375662\C,3.5398916972,5.2669784911,0.4912216279\C,-2.4329188924,4.7267642964,0.0670216998\C,-3.5037777661,5.4312161348,-0.4947425408\C,-4.7907636098,4.9010102995,-0.4760593885\C,-5.0005016787,3.6493918793,0.1061668604\C,-3.9382136249,2.9442882087,0.6717130171\C,-2.6537204386,3.4775311164,0.6596195006\O,-6.2504572108,3.0603474188,0.2514342762\O,6.2874853654,3.0430442846,-0.5949599792\C,-7.2121350752,3.1286403795,-0.7292866954\O,-7.0542564087,3.6952087651,-1.7888804691\O,6.7863817697,2.9611658563,1.6295474901\C,7.1031317147,2.7593458899,0.4778204998\C,-8.4450412803,2.4213127743,-0.3164458988\C,-9.5197640275,2.4010010008,-1.2138642115\C,-8.5828737884,1.7743406259,0.9252045258\C,-10.7107505089,1.7547186309,-0.8961551131\C,-9.7632477391,1.1281097884,1.2520651645\C,-10.8371520911,1.1117388993,0.3448268574\C,8.3918937655,2.1814933944,0.0367846816\C,9.3145492636,1.8157599783,1.0244980405\C,8.7293253269,1.9892402279,-1.3152132493\C,10.549736107,1.2703396437,0.6885113203\C,9.9569661522,1.449005893,-1.6614735791\C,10.8781208705,1.0854843116,-0.6633939827\O,-11.9460866261,0.4498796694,0.7626701461\O,12.0520141645,0.5673468081,-1.1073005049\C,-13.0882485438,0.3842972265,-0.0948678716\C,-14.1577303778,-0.4209379184,0.6304409031\C,13.0469020894,0.1831821555,-0.1550738051\C,14.2529659819,-0.3345609891,-0.9266017074\H,3.3545686717,6.1277502951,1.1222233675\H,5.6247792514,5.1335097979,1.002202542\H,4.1877661538,2.2136815123,-1.7948468304\H,1.908821514,3.1946476059,-1.6664210043\H,-1.8352040279,2.9248011918,1.0985138562\H,-4.1295194752,1.9791976879,1.1293377894\H,-5.6113372727,5.4455782621,-0.9221850769\H,-3.3247525945,6.4028643014,-0.9388241064\H,-9.407087039,2.9018260139,-2.1699030161\H,-7.7588628883,1.7824565202,1.6292576852\H,-11.5258413942,1.755550495,-1.6102935033\H,-9.8853855903,0.6242999492,2.205519911\H,9.0475101953,1.9662304537,2.0654255445\H,8.0235586339,2.2680081528,-2.0892808084\H,11.2430963831,0.9952610808,1.4743737927\H,10.2335520015,1.2964025723,-2.699761728\H,-12.8136969405,-0.095264288,-1.0452075672\H,-13.4449122446,1.4000681083,-0.317972095\H,-13.751876757,-1.414919375,0.8581978646\H,-14.3661265581,0.0623976669,1.593396221\H,12.6442866329,-0.5942191544,0.5100597158\H,13.3229191441,1.0487894218,0.4639617694\H,13.934855128,-1.1759232391,-1.5552635134\H,14.5986109235,0.4546774178,-1.6063843711\C,-15.4510258608,-0.5526974761,-0.1838061811\C,-16.5218724235,-1.3829701183,0.5359638108\H,-15.2299630702,-1.0137888187,-1.1573232377\H,-15.8532120475,0.4471669248,-0.4022150445\C,-17.824943579,-1.5048008441,-0.2633254817\H,-16.1231795961,-2.3866587476,0.7425724895\H,-16.7348760637,-0.9309847051,1.515409101\C,-18.8708219099,-2.360347962,0.4656180077\H,-18.2405313496,-0.5075377908,-0.4510021697\H,-17.6187067754,-1.9494994533,-1.2446384787\H,-18.4881077809,-3.370354636,0.6427267904\H,-19.1135296933,-1.927603993,1.44290

50727\C,-20.1673636815,-2.4822656175,-0.3172865342\C,-21.2578989004,-3  
.3078568038,0.4177790436\C,-22.51367071,-3.6696331493,-0.4307524668\C,  
-23.7289990349,-4.1439102251,0.4252255645\C,15.3934100708,-0.769168046  
4,0.0026541639\C,16.6241749785,-1.2817193076,-0.7566561472\C,17.760404  
3017,-1.7137217549,0.1780903864\H,15.0352981499,-1.5556856007,0.682749  
4851\H,15.6901185913,0.0754845881,0.6412618355\H,16.33221987,-2.127221  
8887,-1.3959500867\H,16.9856940561,-0.4954120644,-1.4350328145\C,18.99  
24774328,-2.2093079358,-0.592568162\C,0.0565656988,8.7783143607,0.2884  
994241\C,1.2547531126,9.487660126,0.1241901423\C,-1.1236268589,9.47419  
7314,0.5913182462\C,1.2419278441,10.8671803608,0.2664162867\C,-1.10301  
78461,10.8613078953,0.727157591\C,0.0843414102,11.576934448,0.56565916  
02\H,18.051074421,-0.8743909074,0.8209353621\H,17.409389667,-2.5118858  
141,0.843884781\H,18.7295916134,-3.0448727203,-1.2489160814\H,19.39975  
61409,-1.4126778476,-1.22570255\H,2.1786353451,8.9748530806,-0.1134309  
105\H,-2.0463403429,8.9217020607,0.7226227835\H,-2.0206320167,11.39239  
68582,0.9635325721\H,0.1252591928,12.6564281374,0.6663893157\F,2.39867  
31985,11.5453538602,0.1051568966\C,20.1013836364,-2.6772098967,0.33508  
14928\C,21.3974260254,-3.097405213,-0.4090419195\C,22.465921398,-3.823  
4576529,0.4630946217\C,23.8835644228,-3.8527601314,-0.1873573961\C,24.  
8382008435,-4.9095778611,0.4400822217\C,26.3367039685,-4.7006248086,0.  
0896708931\C,-24.8182415587,-4.8919259609,-0.3967647408\C,-26.17887509  
45,-5.0422607939,0.3363024973\F,27.0284455642,-5.7795374301,0.47605084  
82\F,26.8240461877,-3.628183644,0.7220185568\F,26.4890836592,-4.539202  
3483,-1.2321621626\F,24.7253083542,-4.8730718337,1.7890919713\F,24.478  
8647795,-6.1335017086,-0.0055119599\F,24.4418801374,-2.62712587,-0.043  
826569\F,23.7642005297,-4.1325266301,-1.506914982\F,22.5721826604,-3.2  
010540855,1.6586545608\F,22.0543490393,-5.0987048911,0.6612577349\F,21.  
.9531883801,-1.9763991224,-0.942363238\F,21.0582367299,-3.9347311209,-  
1.4239822322\F,20.4382937122,-1.6826199449,1.2088968721\F,19.684729911  
5,-3.7524302357,1.0736019208\F,-26.7962435337,-3.8604951339,0.43516124  
99\F,-25.9941341915,-5.5463846293,1.5643851297\F,-25.0478107677,-4.223  
0706257,-1.5516904907\F,-24.2937162141,-3.0556168095,1.0009119567\F,-2  
4.3673069746,-6.1334310947,-0.6813843956\F,-23.293761888,-4.981477587,  
1.3960861115\F,-22.9054662033,-2.5875775802,-1.1405463933\F,-22.173703  
1392,-4.6633454581,-1.2863281137\F,-20.6997402551,-4.4722663674,0.8414  
522838\F,-21.6546799077,-2.5973709763,1.507552085\F,-20.6879461455,-1.  
2434587222,-0.5637273292\F,-19.9432915859,-3.0837762718,-1.5265991179\  
F,-26.9578202082,-5.8779332156,-0.3614762879\\Version=ES64L-G09RevD.01  
\State=2-A\HF=-5677.877626\S2=0.772884\S2-1=0.\S2A=0.750236\RMSD=3.366  
e-09\RMSF=2.635e-06\Dipole=-0.3381985,-0.5629546,0.0517705\Quadrupole=  
-3.0793729,-2.8899291,5.9693021,-5.9370438,-27.3961429,3.1639746\PG=C0  
1 [X(C58H44F27N4O7)]\\
